# Supplementary material for: A process-model-free method for model predictive control via a reference model-based proportional-integral-derivative controller with application to a thermal power plant
Source: Frontiers journal article supplement (doi:10.3389/fcteg.2023.1185502), 2023-04-20
Supplement: Image_1.pdf [file Image_1.pdf]

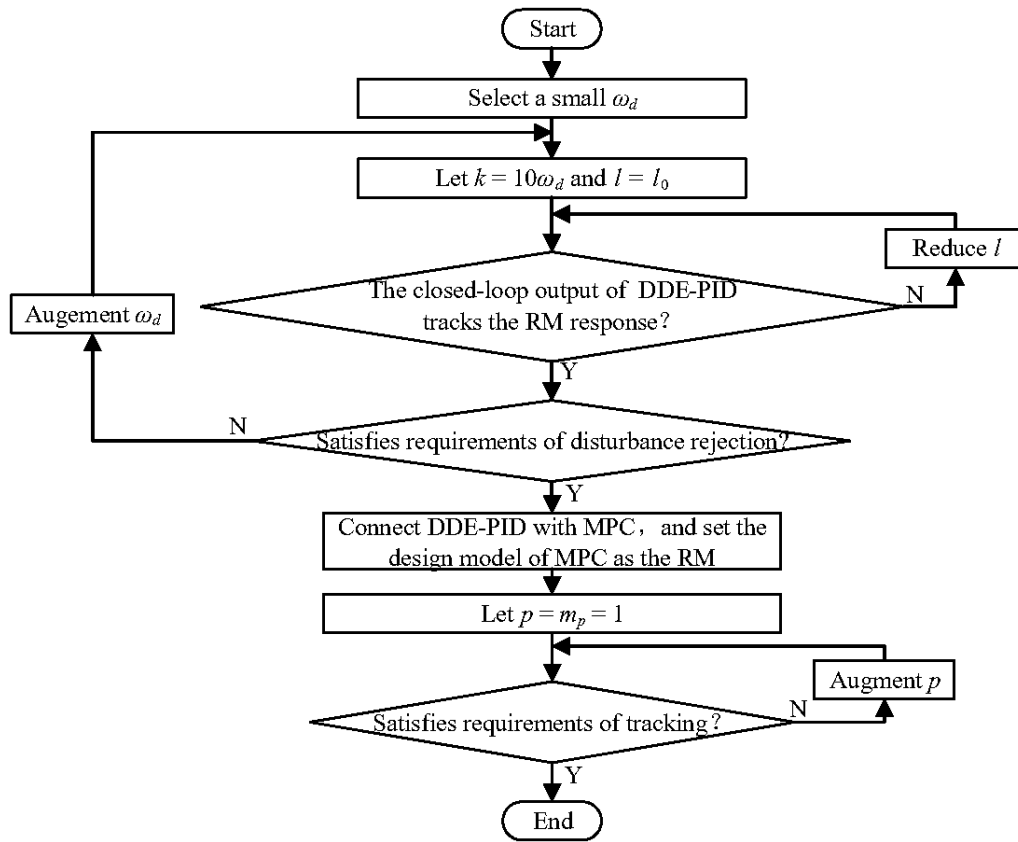

Supplementary Image 1. The tuning procedure of MPC-DDE.

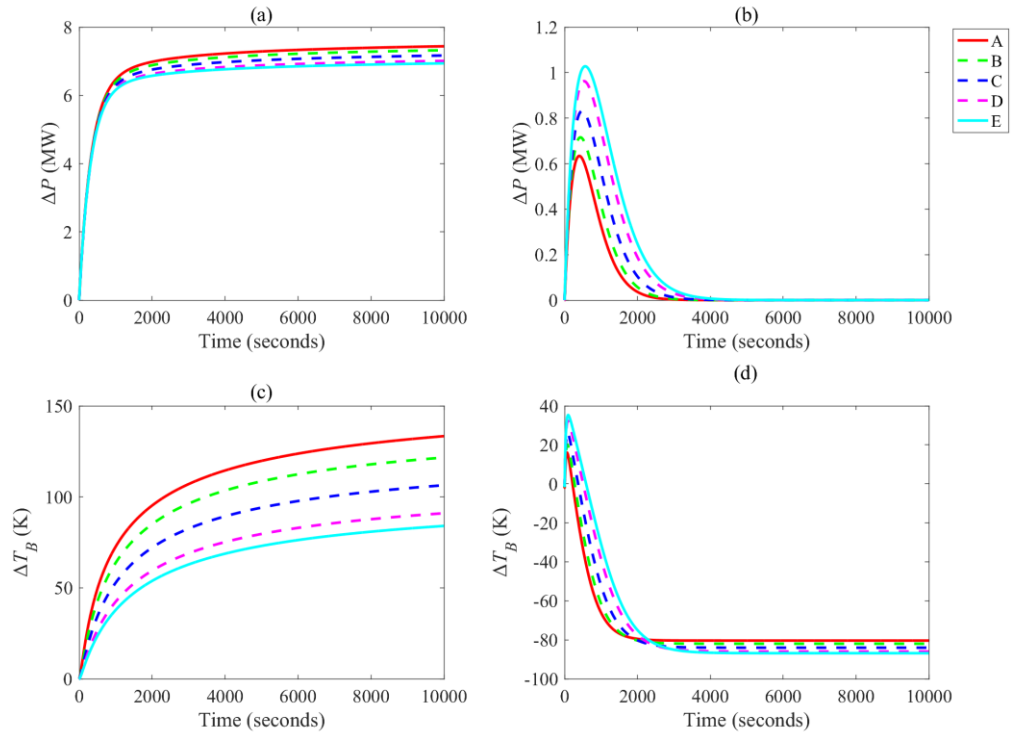

Supplementary Image 2 Open-loop responses of the FBC unit at different steady-state operating points: ((a) and (c): step responses of  $Q_c$ ; (b) and (d): step responses of  $F_1$ )

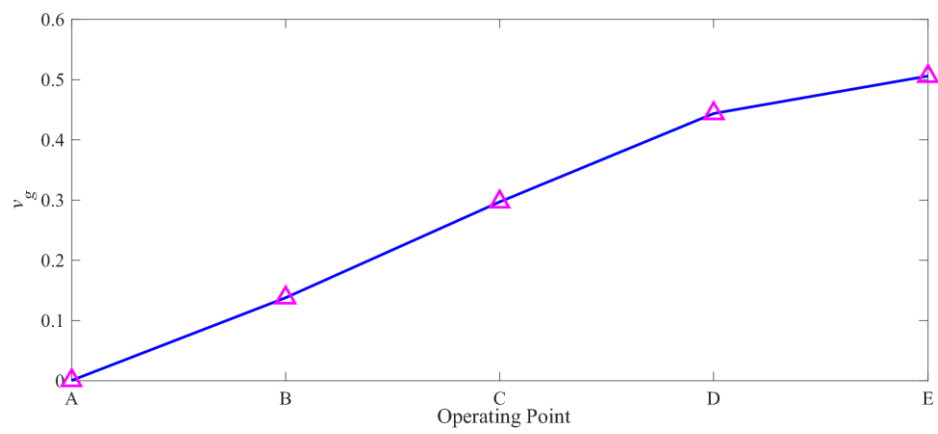

Supplementary Image 3 Gap measurements of FBC unit at different operating points.

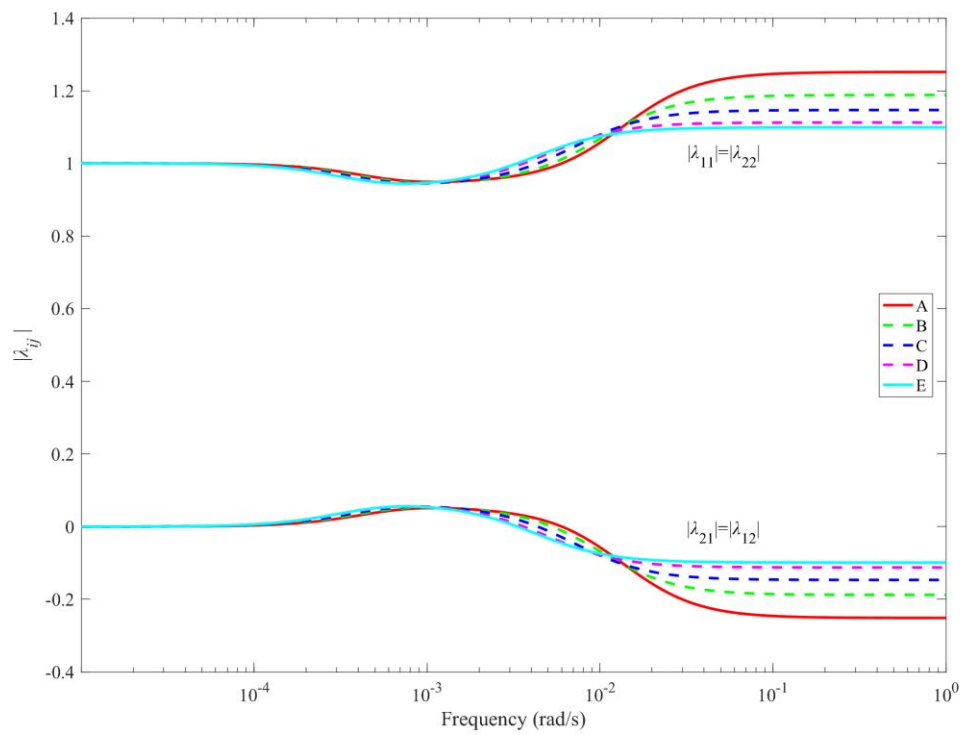

Supplementary Image 4 Frequency-dependent RGA of FBC unit at all operating points.

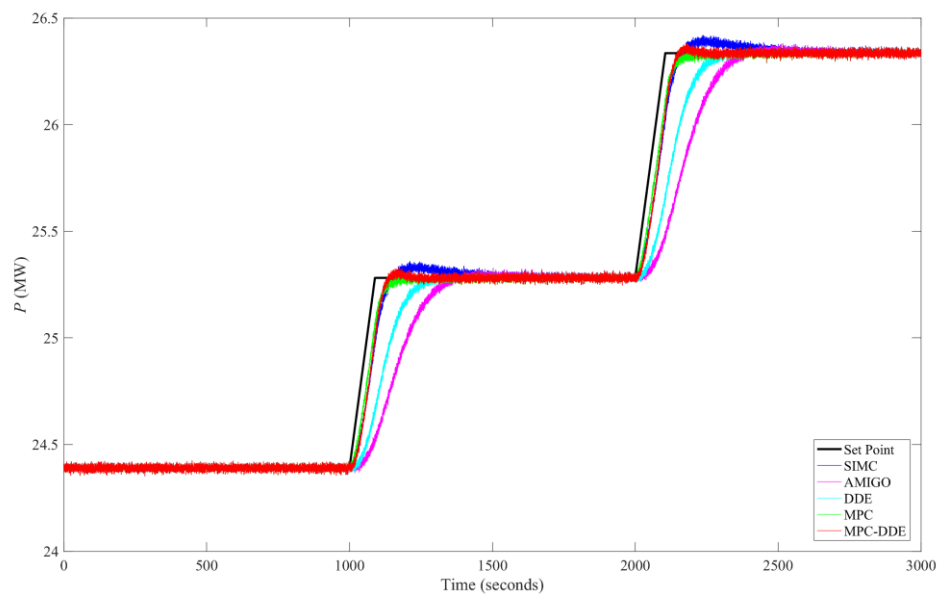

Supplementary Image 5 Variations of output power of different controllers with the measurement noise

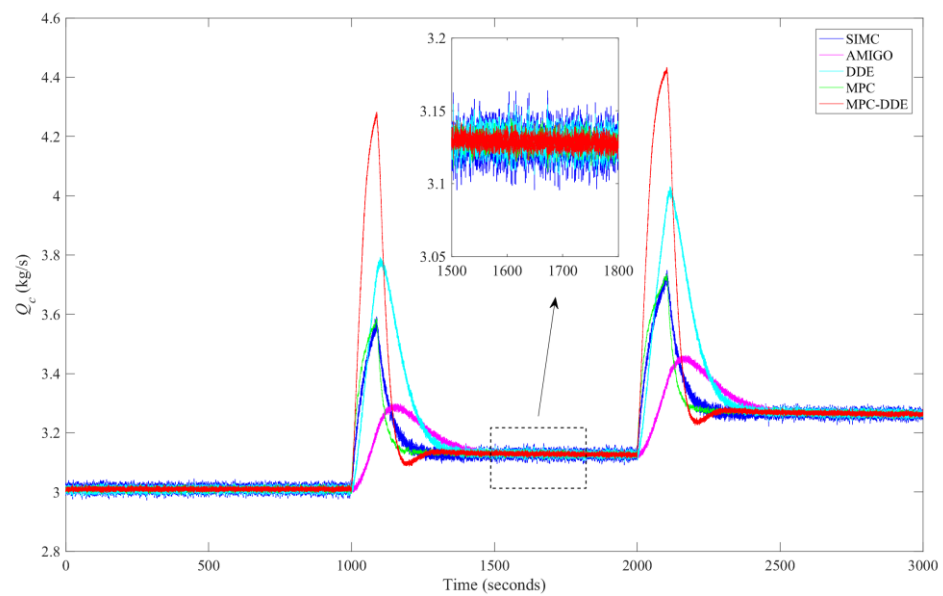

Supplementary Image 6 Variations of fuel feed of different controllers with the measurement noise
