# Supplementary material for: A process-model-free method for model predictive control via a reference model-based proportional-integral-derivative controller with application to a thermal power plant
Source: Frontiers journal article supplement (doi:10.3389/fcteg.2023.1185502), 2023-04-20
Supplement: Table_1.docx [file Table_1.docx]

Supplementary Table 1. Steady-state operating conditions of the FBC unit

| Operating Condition | *Qc* (kg/s) | *F*1 (Nm3/s) | *P* (MW) | *TB* (K) |
| --- | --- | --- | --- | --- |
| A | 3.01 | 3.69 | 24.39 | 1051.60 |
| B | 3.12 | 3.73 | 25.28 | 1069.51 |
| C | 3.25 | 3.77 | 26.33 | 1091.14 |
| D | 3.37 | 3.80 | 27.31 | 1111.58 |
| E | 3.43 | 3.82 | 27.79 | 1121.26 |
