# Supplementary material for: A process-model-free method for model predictive control via a reference model-based proportional-integral-derivative controller with application to a thermal power plant
Source: Frontiers journal article supplement (doi:10.3389/fcteg.2023.1185502), 2023-04-20
Supplement: Table_2.docx [file Table_2.docx]

Supplementary Table 2. Parameters of different controllers for the power loop of the FBC unit.

| SIMC  {*Kp*, *Ti*, *Td*} | AMIGO  {*Kp*, *Ti*, *Td*, *b*} | MPC  {*p*, *mp*} | DDE  {*ωd*, *k*, *l*} | MPC-DDE  {*p*, *mp*, *ωd*, *k*, *l*} |
| --- | --- | --- | --- | --- |
| {1.32, 164.02, 0.05} | {1.22, 110.68, 10.09, 1.22} | {400, 1} | {0.025, 0.25, 0.0002} | {400, 1, 0.025, 0.25, 0.0002} |
