# Supplementary material for: A process-model-free method for model predictive control via a reference model-based proportional-integral-derivative controller with application to a thermal power plant
Source: Frontiers journal article supplement (doi:10.3389/fcteg.2023.1185502), 2023-04-20
Supplement: Table_3.docx [file Table_3.docx]

Supplementary Table 3 Dynamic indices of different controllers for the power loop of FBC unit.

| Controller | *σ* (%) | *Ts* (s) | IAEsp | IAEud |
| --- | --- | --- | --- | --- |
| SIMC | 7.41 | 282 | 52.2493 | 124.1418 |
| AMIGO | 2.02 | 260.6 | 130.6679 | 94.8685 |
| MPC | 0 | 75.4 | 26.1263 | 178.4440 |
| DDE | 0 | 188.7 | 80.2084 | 1.2804 |
| MPC-DDE | 2.71 | 63.3 | 29.9596 | 0.5949 |
