# Supplementary material for: A process-model-free method for model predictive control via a reference model-based proportional-integral-derivative controller with application to a thermal power plant
Source: Frontiers journal article supplement (doi:10.3389/fcteg.2023.1185502), 2023-04-20
Supplement: Table_4.docx [file Table_4.docx]

Supplementary Table 4 RMS values of control signals of different controllers

| SIMC | AMIGO | MPC | DDE | MPC-DDE |
| --- | --- | --- | --- | --- |
| 3.1290 | 3.1287 | 3.1279 | 3.1282 | 3.1278 |
